# Supplementary material
Source: PubMed Central journal article supplement (PMC4256341)
Supplement: supp_M114.604041_jbc.M114.604041-1.pdf [file supp_M114.604041_jbc.M114.604041-1.pdf]

## **Cellular retinoic acid binding protein 2 inhibits tumor growth by two distinct mechanisms**

Amanda C. Vreeland, Liraz Levi, Wei Zhang, Daniel C. Berry, and Noa Noy

### **Supplemental Information**

Table S1: List of 135 genes identified by Venn analysis to be regulated by both CRABP2 and HuR.

| transcript cluster ID | name/gene ID  | description                                                                        | fold change shHuR/shLuc | fold change shCRABP2/shLuc |
|-----------------------|---------------|------------------------------------------------------------------------------------|-------------------------|----------------------------|
| 16957951              | POLQ          | polymerase (DNA directed), theta                                                   | -2.42                   | -1.41                      |
| 16702571              | MCM10         | minichromosome maintenance complex component 10                                    | -2.41                   | -1.32                      |
| 16852445              | C18orf54      | chromosome 18 open reading frame 54                                                | -2.32                   | -1.23                      |
| 16714998              | DNA2          | DNA replication helicase 2 homolog (yeast)                                         | -2.26                   | -1.3                       |
| 16826160              | SHCBP1        | SHC SH2-domain binding protein 1                                                   | -2.23                   | -1.56                      |
| 16916958              | PCNA          | proliferating cell nuclear antigen                                                 | -2.19                   | -1.23                      |
| 16937505              | FANCD2        | Fanconi anemia, complementation group D2                                           | -2.14                   | -1.29                      |
| 16842673              | SPAG5, SGK494 | sperm associated antigen 5, uncharacterized serine/threonine-protein kinase Sgk494 | -2.12                   | -1.34                      |
| 16953279              | CDC25A        | cell division cycle 25 homolog A (S. pombe)                                        | -2.06                   | -1.61                      |
| 17079293              | CCNE2         | cyclin E2                                                                          | -2.06                   | -1.31                      |
| 16927052              | CDC45         | cell division cycle 45 homolog (S. cerevisiae)                                     | -2.04                   | -1.29                      |
| 16677556              | TGFB2         | transforming growth factor, beta 2                                                 | -2.03                   | -1.59                      |
| 16784215              | GPR137C       | G protein-coupled receptor 137C                                                    | -2.03                   | -1.23                      |
| 16687352              | LRP8          | low density lipoprotein receptor-related protein 8, apolipoprotein e receptor      | -2.02                   | -1.5                       |
| 17107211              | SLC9A6        | solute carrier family 9, subfamily A (NHE6, cation proton antiporter 6), member 6  | -2                      | -1.3                       |
| 17084904              | MELK          | maternal embryonic leucine zipper kinase                                           | -1.99                   | -1.24                      |
| 16829369              | FANCA         | Fanconi anemia, complementation group A                                            | -1.98                   | -1.24                      |
| 17123142              |               |                                                                                    | -1.96                   | -1.23                      |
| 16773840              | BRCA2         | breast cancer 2, early onset                                                       | -1.95                   | -1.37                      |
| 16804559              | FANCI         | Fanconi anemia, complementation group I                                            | -1.95                   | -1.27                      |
| 16868838              | SPC24         | SPC24, NDC80 kinetochore complex component, homolog (S. cerevisiae)                | -1.92                   | -1.53                      |
| 16662648              | CDCA8         | cell division cycle associated 8                                                   | -1.91                   | -1.32                      |
| 16849148              | RNF157        | ring finger protein 157                                                            | -1.91                   | -1.32                      |
| 16958403              | HEG1          | HEG homolog 1 (zebrafish)                                                          | -1.9                    | -1.58                      |
| 16914315              | UBE2C         | ubiquitin-conjugating enzyme E2C                                                   | -1.88                   | -1.3                       |
| 16819952              | CBFB          | core-binding factor, beta subunit                                                  | -1.87                   | -1.5                       |
| 17038792              | KIFC1         | kinesin family member C1                                                           | -1.87                   | -1.26                      |
| 16830173              | FAM64A        | family with sequence similarity 64, member A                                       | -1.84                   | -1.36                      |
| 17067102              | CDCA2         | cell division cycle associated 2                                                   | -1.84                   | -1.29                      |
| 16860103              | ZNF93         | zinc finger protein 93                                                             | -1.84                   | -1.21                      |
| 16802519              | KIF23         | kinesin family member 23                                                           | -1.82                   | -1.21                      |
| 16901957              | CKAP2L        | cytoskeleton associated protein 2-like                                             | -1.8                    | -1.26                      |

| transcript cluster ID | name/gene ID | description                                                    | fold change shHuR/shLuc | fold change shCRABP2/shLuc |
|-----------------------|--------------|----------------------------------------------------------------|-------------------------|----------------------------|
| 17067332              | ESCO2        | establishment of cohesion 1 homolog 2 ( <i>S. cerevisiae</i> ) | -1.79                   | -1.24                      |
| 16725735              | FEN1         | flap structure-specific endonuclease 1                         | -1.77                   | -1.43                      |
| 16766403              | TMEM194A     | transmembrane protein 194A                                     | -1.76                   | -1.32                      |
| 16877019              | RRM2         | ribonucleotide reductase M2                                    | -1.76                   | -1.26                      |
| 16719515              | MKI67        | antigen identified by monoclonal antibody Ki-67                | -1.76                   | -1.21                      |
| 16760048              | FOXM1        | forkhead box M1                                                | -1.75                   | -1.4                       |
| 16784299              | CDKN3        | cyclin-dependent kinase inhibitor 3                            | -1.75                   | -1.22                      |
| 16714747              | RTKN2        | rhotekin 2                                                     | -1.74                   | -1.38                      |
| 16912192              | GINS1        | GINS complex subunit 1 (Psf1 homolog)                          | -1.73                   | -1.22                      |
| 16988703              | LMNB1        | lamin B1                                                       | -1.72                   | -1.27                      |
| 16673557              | C1orf112     | chromosome 1 open reading frame 112                            | -1.72                   | -1.24                      |
| 16913681              | FAM83D       | family with sequence similarity 83, member D                   | -1.71                   | -1.31                      |
| 16931384              | GTSE1        | G-2 and S-phase expressed 1                                    | -1.69                   | -1.31                      |
| 16818600              | ORC6         | origin recognition complex, subunit 6                          | -1.69                   | -1.23                      |
| 17103413              | SUV39H1      | suppressor of variegation 3-9 homolog 1 ( <i>Drosophila</i> )  | -1.66                   | -1.28                      |
| 16935195              | CBX6         | chromobox homolog 6                                            | -1.65                   | -1.45                      |
| 16803562              | CHRNA5       | cholinergic receptor, nicotinic, alpha 5 (neuronal)            | -1.64                   | -1.37                      |
| 16707551              | CEP55        | centrosomal protein 55kDa                                      | -1.64                   | -1.23                      |
| 16729557              | C11orf82     | chromosome 11 open reading frame 82                            | -1.63                   | -1.22                      |
| 16801557              | CCNB2        | cyclin B2                                                      | -1.59                   | -1.25                      |
| 16920548              | AURKA        | aurora kinase A                                                | -1.59                   | -1.21                      |
| 16663155              | CTPS1        | CTP synthase 1                                                 | -1.57                   | -1.34                      |
| 16701077              | FH           | fumarate hydratase                                             | -1.57                   | -1.27                      |
| 16777502              | CENPJ        | centromere protein J                                           | -1.55                   | -1.23                      |
| 16744125              | KDEL2        | KDEL (Lys-Asp-Glu-Leu) containing 2                            | -1.5                    | -1.39                      |
| 17113079              | MORC4        | MORC family CW-type zinc finger 4                              | -1.5                    | -1.25                      |
| 16844927              |              |                                                                | -1.49                   | -1.27                      |
| 16755692              | GAS2L3       | growth arrest-specific 2 like 3                                | -1.49                   | -1.22                      |
| 17087861              | TMEM38B      | transmembrane protein 38B                                      | -1.47                   | -1.62                      |
| 16836492              | PRR11        | proline rich 11                                                | -1.44                   | -1.43                      |
| 17023551              | EPB41L2      | erythrocyte membrane protein band 4.1-like 2                   | -1.44                   | -1.23                      |
| 16924878              | TIAM1        | T-cell lymphoma invasion and metastasis 1                      | -1.44                   | -1.21                      |
| 17114334              | MIR503       | microRNA 503                                                   | -1.42                   | -1.66                      |
| 17119058              |              |                                                                | -1.41                   | -1.64                      |
| 16687418              | TMEM48       | transmembrane protein 48                                       | -1.41                   | -1.59                      |

| transcript cluster ID | name/gene ID                  | description                                                                                                                                                                                                           | fold change shHuR/shLuc | fold change shCRABP2/shLuc |
|-----------------------|-------------------------------|-----------------------------------------------------------------------------------------------------------------------------------------------------------------------------------------------------------------------|-------------------------|----------------------------|
| 16708802              | TAF5                          | TAF5 RNA polymerase II, TATA box binding protein (TBP)-associated factor, 100kDa                                                                                                                                      | -1.4                    | -1.49                      |
| 16819430              | CPNE2                         | copine II                                                                                                                                                                                                             | -1.4                    | -1.36                      |
| 16877762              | CENPO                         | centromere protein O                                                                                                                                                                                                  | -1.4                    | -1.23                      |
| 17107045              | HPRT1                         | hypoxanthine phosphoribosyltransferase 1                                                                                                                                                                              | -1.38                   | -1.27                      |
| 17115428              | IRAK1                         | interleukin-1 receptor-associated kinase 1                                                                                                                                                                            | -1.38                   | -1.22                      |
| 16668079              | GPSM2                         | G-protein signaling modulator 2                                                                                                                                                                                       | -1.37                   | -1.23                      |
| 16660199              | MRTO4                         | mRNA turnover 4 homolog (S. cerevisiae)                                                                                                                                                                               | -1.36                   | -1.33                      |
| 16866702              | MEX3D                         | mex-3 homolog D (C. elegans)                                                                                                                                                                                          | -1.35                   | -1.58                      |
| 16886677              | GPD2                          | glycerol-3-phosphate dehydrogenase 2 (mitochondrial)                                                                                                                                                                  | -1.33                   | -1.8                       |
| 16763060              | SYT10                         | synaptotagmin X                                                                                                                                                                                                       | -1.32                   | -1.21                      |
| 17115505              | FLNA                          | filamin A, alpha                                                                                                                                                                                                      | -1.3                    | -1.41                      |
| 16922639              | DSCR6                         | Down syndrome critical region gene 6                                                                                                                                                                                  | -1.29                   | -1.53                      |
| 17056992              | GLI3                          | GLI family zinc finger 3                                                                                                                                                                                              | -1.29                   | -1.22                      |
| 16956714              | DCBLD2                        | discoïdin, CUB and LCCL domain containing 2                                                                                                                                                                           | -1.28                   | -1.55                      |
| 16894402              | ODC1                          | ornithine decarboxylase 1                                                                                                                                                                                             | -1.28                   | -1.25                      |
| 16657473              | OR4F29, OR4F16, OR4F3, OR4F21 | olfactory receptor, family 4, subfamily F, member 29, olfactory receptor, family 4, subfamily F, member 16, olfactory receptor, family 4, subfamily F, member 3, olfactory receptor, family 4, subfamily F, member 21 | -1.27                   | -1.29                      |
| 16679938              | OR4F29, OR4F16, OR4F3, OR4F21 | olfactory receptor, family 4, subfamily F, member 29, olfactory receptor, family 4, subfamily F, member 16, olfactory receptor, family 4, subfamily F, member 3, olfactory receptor, family 4, subfamily F, member 21 | -1.27                   | -1.29                      |
| 16993681              | OR4F29, OR4F16, OR4F3, OR4F21 | olfactory receptor, family 4, subfamily F, member 29, olfactory receptor, family 4, subfamily F, member 16, olfactory receptor, family 4, subfamily F, member 3, olfactory receptor, family 4, subfamily F, member 21 | -1.27                   | -1.29                      |
| 16817509              | NFATC2IP                      | nuclear factor of activated T-cells, cytoplasmic, calcineurin-dependent 2 interacting protein                                                                                                                         | -1.26                   | -1.23                      |
| 16854486              | DSC2                          | desmocollin 2                                                                                                                                                                                                         | -1.25                   | -1.31                      |
| 16787902              | SERPINA3                      | serpin peptidase inhibitor, clade A (alpha-1 antitrypsin), member 3                                                                                                                                                   | -1.23                   | -1.64                      |

| <b>transcript cluster ID</b> | <b>name/gene ID</b>   | <b>description</b>                                                      | <b>fold change shHuR/shLuc</b> | <b>fold change shCRABP2/shLuc</b> |
|------------------------------|-----------------------|-------------------------------------------------------------------------|--------------------------------|-----------------------------------|
| 16756111                     | TDG                   | thymine-DNA glycosylase                                                 | -1.22                          | -1.49                             |
| 16989262                     |                       |                                                                         | 1.4                            | -1.5                              |
| 17085901                     | ANXA1                 | annexin A1                                                              | 1.76                           | -1.35                             |
| 17101292                     | STS                   | steroid sulfatase (microsomal), isozyme S                               | 1.47                           | -1.25                             |
| 16707120                     | STAMBPL1              | STAM binding protein-like 1                                             | 1.26                           | -1.22                             |
| 16961616                     | TNFSF10               | tumor necrosis factor (ligand) superfamily, member 10                   | 3.45                           | 1.45                              |
| 16911493                     | SPTLC3                | serine palmitoyltransferase, long chain base subunit 3                  | 2.85                           | 1.43                              |
| 16801299                     | FLJ27352              | uncharacterized LOC145788                                               | 1.99                           | 1.42                              |
| 16908197                     | IGFBP5                | insulin-like growth factor binding protein 5                            | 1.96                           | 1.21                              |
| 16917632                     |                       |                                                                         | 1.92                           | 1.43                              |
| 17064848                     |                       |                                                                         | 1.88                           | 1.43                              |
| 17120628                     |                       |                                                                         | 1.87                           | 1.32                              |
| 17005515                     | TRIM38                | tripartite motif containing 38                                          | 1.85                           | 1.26                              |
| 17120632                     |                       |                                                                         | 1.81                           | 1.34                              |
| 16911804                     | SLC24A3               | solute carrier family 24 (sodium/potassium/calcium exchanger), member 3 | 1.74                           | 1.31                              |
| 16731269                     | LOC283140             | uncharacterized LOC283140                                               | 1.7                            | 1.71                              |
| 16711987                     | CDNF                  | cerebral dopamine neurotrophic factor                                   | 1.69                           | 1.23                              |
| 16692918                     | FAM63A                | family with sequence similarity 63, member A                            | 1.69                           | 1.3                               |
| 16888999                     | PCGEM1                | prostate-specific transcript 1 (non-protein coding)                     | 1.66                           | 1.78                              |
| 16818977                     |                       |                                                                         | 1.63                           | 1.3                               |
| 16912127                     |                       |                                                                         | 1.62                           | 1.33                              |
| 16836528                     | YPEL2                 | yippee-like 2 (Drosophila)                                              | 1.61                           | 1.25                              |
| 16992467                     | CREBRF                | CREB3 regulatory factor                                                 | 1.58                           | 1.47                              |
| 16824109                     | PLA2G10, LOC100652777 | phospholipase A2, group X, group 10 secretory phospholipase A2-like     | 1.58                           | 1.52                              |
| 16756310                     | TCP11L2               | t-complex 11 (mouse)-like 2                                             | 1.57                           | 1.48                              |
| 16872254                     | DYRK1B                | dual-specificity tyrosine-(Y)-phosphorylation regulated kinase 1B       | 1.53                           | 1.39                              |
| 17078995                     |                       |                                                                         | 1.51                           | 1.21                              |
| 16713530                     | CXCL12                | chemokine (C-X-C motif) ligand 12                                       | 1.48                           | 1.29                              |
| 17014963                     | EXOC2                 | exocyst complex component 2                                             | 1.48                           | 1.4                               |
| 16908037                     | FN1                   | fibronectin 1                                                           | 1.47                           | 1.44                              |
| 16678651                     | CAPN9                 | calpain 9                                                               | 1.46                           | 1.29                              |
| 16797340                     | IGHE                  | immunoglobulin heavy constant epsilon                                   | 1.46                           | 1.37                              |

| transcript cluster ID | name/gene ID                                                                                                                                                                     | description                                                                                                                                                                                                                                                                                                                                   | fold change shHuR/shLuc | fold change shCRABP2/shLuc |
|-----------------------|----------------------------------------------------------------------------------------------------------------------------------------------------------------------------------|-----------------------------------------------------------------------------------------------------------------------------------------------------------------------------------------------------------------------------------------------------------------------------------------------------------------------------------------------|-------------------------|----------------------------|
| 16971443              | FAM160A1                                                                                                                                                                         | family with sequence similarity 160, member A1                                                                                                                                                                                                                                                                                                | 1.44                    | 1.22                       |
| 17016406              | HIST2H4B,<br>HIST4H4,<br>HIST2H4A,<br>HIST1H4L,<br>HIST1H4E,<br>HIST1H4B,<br>HIST1H4H,<br>HIST1H4C,<br>HIST1H4J,<br>HIST1H4K,<br>HIST1H4F,<br>HIST1H4D,<br>HIST1H4A,<br>HIST1H4I | histone cluster 2, H4b, histone cluster 4, H4, histone cluster 2, H4a, histone cluster 1, H4l, histone cluster 1, H4e, histone cluster 1, H4b, histone cluster 1, H4h, histone cluster 1, H4c, histone cluster 1, H4j, histone cluster 1, H4k, histone cluster 1, H4f, histone cluster 1, H4d, histone cluster 1, H4a, histone cluster 1, H4i | 1.44                    | 1.23                       |
| 16892075              | ARMC9                                                                                                                                                                            | armadillo repeat containing 9                                                                                                                                                                                                                                                                                                                 | 1.42                    | 1.22                       |
| 16748835              | PIK3C2G                                                                                                                                                                          | phosphoinositide-3-kinase, class 2, gamma polypeptide                                                                                                                                                                                                                                                                                         | 1.41                    | 1.31                       |
| 16817692              | MVP                                                                                                                                                                              | major vault protein                                                                                                                                                                                                                                                                                                                           | 1.39                    | 1.26                       |
| 17120630              |                                                                                                                                                                                  |                                                                                                                                                                                                                                                                                                                                               | 1.37                    | 1.29                       |
| 16910154              | PP14571                                                                                                                                                                          | uncharacterized LOC100130449                                                                                                                                                                                                                                                                                                                  | 1.37                    | 1.33                       |
| 17124832              |                                                                                                                                                                                  |                                                                                                                                                                                                                                                                                                                                               | 1.36                    | 1.23                       |
| 16779283              | DHRS12                                                                                                                                                                           | dehydrogenase/reductase (SDR family) member 12                                                                                                                                                                                                                                                                                                | 1.36                    | 1.31                       |
| 17010461              | MYO6                                                                                                                                                                             | myosin VI                                                                                                                                                                                                                                                                                                                                     | 1.36                    | 1.36                       |
| 17045787              | RAMP3                                                                                                                                                                            | receptor (G protein-coupled) activity modifying protein 3                                                                                                                                                                                                                                                                                     | 1.34                    | 1.3                        |
| 16826539              | AKTIP,<br>LOC100130746                                                                                                                                                           | AKT interacting protein, AKT interacting protein pseudogene                                                                                                                                                                                                                                                                                   | 1.3                     | 1.23                       |
| 16906140              | PDE1A                                                                                                                                                                            | phosphodiesterase 1A, calmodulin-dependent                                                                                                                                                                                                                                                                                                    | 1.27                    | 1.47                       |
| 16945682              | ACPP                                                                                                                                                                             | acid phosphatase, prostate                                                                                                                                                                                                                                                                                                                    | 1.25                    | 1.61                       |
| 16841982              | TOM1L2                                                                                                                                                                           | target of myb1-like 2 (chicken)                                                                                                                                                                                                                                                                                                               | 1.21                    | 1.21                       |
